# Supplementary material
Source: MDPI journal article supplement (https://www.mdpi.com/search?q=toxins-12-00592)
Supplement: s001 [file toxins-12-00592-s001.pdf]

# Supplementary Materials: Genetic diversity and Ochratoxin A profile of strains of *Aspergillus* section *Nigri* isolated from dried vine fruits

Petra Mikušová, Miroslav Caboň, Andrea Melichárková, Martin Urík, Alberto Ritieni and Marek Slovák

**Table S1.** List of reference strains and GenBank accession numbers used in the study. An Ex-type strain as defined in McNeill et al. ([1], Recommendation 8B).

| Species                                  | Ex-type              | ITS      | CaM      | BenA     |
|------------------------------------------|----------------------|----------|----------|----------|
| <i>Aspergillus aculeatinus</i>           | CBS 121060           | EU159211 | EU159241 | EU159220 |
| <i>Aspergillus aculeatus</i>             | CBS 172.66           | EF661221 | EF661148 | HE577806 |
| <i>Aspergillus brasiliensis</i>          | CBS 101740           | FJ629321 | FN594543 | FJ629272 |
| <i>Aspergillus brunneoviolaceus</i>      | CBS 621.78           | AJ280003 | EF661147 | EF661105 |
| <i>Aspergillus carbonarius</i>           | CBS 111.26           | EF661204 | EF661167 | EF661099 |
| <i>Aspergillus costaricaensis</i>        | CBS 115574           | DQ900602 | FN594545 | FJ629277 |
| <i>Aspergillus ellipticus</i>            | CBS 482.65           | EF661194 | EF661170 | EF661122 |
| <i>Aspergillus eucalypticola</i>         | CBS 122712           | EU482439 | EU482433 | EU482435 |
| <i>Aspergillus floridensis</i>           | NRRL62478, ITEM14783 | -        | HE984429 | HE984412 |
| <i>Aspergillus heteromorphus</i>         | CBS 117.55           | EU821305 | EF661169 | EF661103 |
| <i>Aspergillus homomorphus</i>           | CBS 101889           | EF166063 | FN594549 | AY820015 |
| <i>Aspergillus ibericus</i>              | NRLL 35644           | EF661200 | EF661163 | EF661102 |
| <i>Aspergillus indologenus</i>           | CBS 114.80           | aj280005 | AM419750 | AY585539 |
| <i>Aspergillus japonicus</i>             | CBS 114.51           | AJ279985 | FN594551 | HE577804 |
| <i>Aspergillus labruscus</i>             | ITAL 22.223          | KU708544 | KT986008 | KT986014 |
| <i>Aspergillus luchuensis</i>            | CBS 205.80           | JX500081 | JX500071 | JX500062 |
| <i>Aspergillus neoniger</i>              | CBS 115656           | FJ491682 | FJ491700 | FJ491691 |
| <i>Aspergillus niger</i>                 | CBS 554.65           | EF661186 | EF661154 | EF661089 |
| <i>Aspergillus piperis</i>               | CBS 112811           | EU821316 | EU163267 | FJ629303 |
| <i>Aspergillus saccharolyticus</i>       | CBS 127449           | HM853552 | HM853554 | HM853553 |
| <i>Aspergillus sclerotii-carbonarius</i> | CBS 121057           | EU159216 | EU159235 | EU159235 |
| <i>Aspergillus sclerotioniger</i>        | CBS 115572           | DQ900606 | FN594557 | FJ629304 |
| <i>Aspergillus trinidadensis</i>         | NRRL 62479           | -        | HE984434 | HE984420 |
| <i>Aspergillus tubingensis</i>           | NRRL 4875            | EF661193 | EF661151 | EF661086 |
| <i>Aspergillus uvarum</i>                | CBS 121591           | AM745757 | AM745755 | AM745751 |
| <i>Aspergillus vadensis</i>              | CBS 113365           | AY585549 | FN594560 | AY585531 |
| <i>Aspergillus welwitschiae</i>          | CBS 139.54           | FJ629340 | KC480196 | FJ629291 |

**Table S2:** Genotype assignments of isolated strains. GenBank accession numbers are indicated in the brackets.

| Species               | ITS Ribotype         | CaM Haplotype        | benA Haplotype        | Concatenated ITS/CaM/benA Genotype | Isolated Strains |
|-----------------------|----------------------|----------------------|-----------------------|------------------------------------|------------------|
| <i>A. carbonarius</i> | ITS_IV<br>(MK046883) | CaM_IX<br>(MK046876) | benA_I (<br>MT166308) | Concat_I                           | G_187            |
|                       |                      |                      | benA_II<br>(MT166309) | Concat_II                          | G_191            |

|                            |                                 |                        |                          |                        |                         |       |
|----------------------------|---------------------------------|------------------------|--------------------------|------------------------|-------------------------|-------|
| <i>A. luchuensis</i>       |                                 | CaM_VII<br>(MK046871)  | benA_III<br>(MT166310)   | Concat_III             | G_062                   |       |
|                            |                                 |                        | benA_IV<br>(MT166311)    | Concat_IV              | G_198                   |       |
|                            |                                 | CaM_VI<br>(MK046872)   | benA_V<br>(MT166312)     | Concat_V               | G_201<br>G_204          |       |
|                            |                                 |                        | benA_VI<br>(MT166313)    | Concat_VI              | G_202                   |       |
|                            |                                 | CaM_VIII<br>(MK046879) | benA_VII<br>(MT166314)   | Concat_VII             | G_199                   |       |
|                            |                                 | CaM_III<br>(MK046873)  | benA_VIII<br>(MT166315)  | Concat_VIII            | G_132                   |       |
|                            |                                 |                        | benA_IX<br>(MT166316)    | Concat_IX              | G_172                   |       |
|                            |                                 |                        | benA_X<br>(MT166317)     | Concat_X               | G_184                   |       |
|                            |                                 |                        | benA_XI<br>(MT166318)    | Concat_XI              | G_183                   |       |
|                            |                                 | ITS_I<br>(MK046882)    | benA_XII<br>(MT166319)   | Concat_XII             | G_168                   |       |
| <i>A. tuingensis</i>       |                                 | CaM_I<br>(MK046874)    | benA_XIII<br>(MT166320)  | Concat_XIII            | G_178<br>G_188<br>G_211 |       |
|                            |                                 |                        | benA_XIV<br>(MT166321)   | Concat_XIV             | G_176                   |       |
|                            |                                 |                        | benA_XV<br>(MT166322)    | Concat_XV              | G_182                   |       |
|                            |                                 |                        | benA_XVI*<br>(MT166323)  | Concat_XVI             | G_190                   |       |
|                            |                                 |                        | benA_XVII<br>(MT166324)  | Concat_XVII            | G_174<br>G_180          |       |
|                            |                                 | CaM_II<br>(MK046870)   | benA_XVI*<br>(MT166323)  | Concat_XVIII           | G_045<br>G_160          |       |
|                            |                                 | CaM_IV<br>(MK046875)   | benA_XVIII<br>(MT166325) | Concat_XX              | G_171                   |       |
|                            |                                 | CaM_V<br>(MK046877)    | benA_XIX<br>(MT166326)   | Concat_XXI             | G_192                   |       |
|                            | <i>A. aff.<br/>welwitschiae</i> | ITS_III<br>(MK046881)  | CaM_XI<br>(MK046869)     | benA_XX<br>(MT166327)  | Concat_XXII             | G_036 |
|                            |                                 |                        |                          | benA_XXI<br>(MT166328) | Concat_XXIII            | G_166 |
| <i>A.<br/>welwitschiae</i> | ITS_II<br>(MK046880)            | CaM_XII<br>(MK046878)  | benA_XXII<br>(MT166329)  | Concat_XXIV            | G_196                   |       |

|    |                    |                     |                          |            |             |
|----|--------------------|---------------------|--------------------------|------------|-------------|
| A. | A.<br><i>niger</i> | CaM_X<br>(MK046868) | benA_XXIII<br>(MT166330) | Concat_XXV | G_033       |
|    |                    |                     | benA_XXIV<br>(MT166331)  |            | Concat_XXVI |

\* Strains G\_061 and G\_190 represent identical genotype benA\_XVI. Strains G\_085, G\_131, G\_189, G\_212, G\_203 were not assigned to genotypes due to missing data and their position is resolved in maximum likelihood analysis.

**Table S3.** The list of strains selected for individual analyses for toxigenic ability using HPLC, Abbreviations: b.d.l. = below detection limit, FB2 = fumonisin B2, FB1 = fumonisin B1.

| Aspergillus sect. Nigri | Strain Code | Level of FB1 | Level of FB2 | Level of OTA |
|-------------------------|-------------|--------------|--------------|--------------|
|                         |             | (µg/kg)      | (µg/kg)      | (µg/kg)      |
| A. carbonarius          | G_187       | b.d.l.       | b.d.l.       | 4381,911873  |
| A. carbonarius          | G_191       | b.d.l.       | b.d.l.       | 2477,256     |
| A. luchuensis           | G_199       | b.d.l.       | b.d.l.       | b.d.l.       |
| A. luchuensis           | G_202       | b.d.l.       | b.d.l.       | b.d.l.       |
| A. luchuensis           | G_204       | b.d.l.       | b.d.l.       | b.d.l.       |
| A. luchuensis           | G_201       | b.d.l.       | b.d.l.       | b.d.l.       |
| A. luchuensis           | G_198       | b.d.l.       | b.d.l.       | b.d.l.       |
| A. luchuensis           | G_062       | b.d.l.       | b.d.l.       | b.d.l.       |
| A. niger                | G_033       | 1213,375     | 11118,651    | b.d.l.       |
| A. niger                | G_209       | 510,889      | 5509,260     | b.d.l.       |
| A. niger                | G_210       | 535,653      | 5568,915     | b.d.l.       |
| A. niger                | G_050       | 611,370      | 7413,953     | b.d.l.       |
| A. welwitschiae         | G_036       | b.d.l.       | b.d.l.       | b.d.l.       |
| A. welwitschiae         | G_166       | b.d.l.       | b.d.l.       | b.d.l.       |
| A. welwitschiae         | G_196       | b.d.l.       | b.d.l.       | b.d.l.       |
| A. tubingensis          | G_178       | b.d.l.       | b.d.l.       | b.d.l.       |
| A. tubingensis          | G_180       | b.d.l.       | b.d.l.       | b.d.l.       |
| A. tubingensis          | G_132       | b.d.l.       | b.d.l.       | b.d.l.       |
| A. tubingensis          | G_160       | b.d.l.       | b.d.l.       | b.d.l.       |
| A. tubingensis          | G_171       | b.d.l.       | b.d.l.       | b.d.l.       |
